# Supplementary material for: Exposure to Particulate Matter in the Broiler House Causes Dyslipidemia and Exacerbates It by Damaging Lung Tissue in Broilers
Source: MDPI journal article supplement (doi:10.3390/metabo13030363), 2023-02-28
Supplement: s1 [file s1]

# **Exposure to particulate matter in the broiler house causes dyslipidemia through damaging lung tissue in broilers**

Dan Shen<sup>1</sup>, Qi Guo<sup>1</sup>, Kai Huang<sup>1</sup>, Weijia Mao<sup>1</sup>, Kai Wang<sup>1</sup>, Wenjie Zeng<sup>1</sup>, Yansen Li<sup>1</sup>,  
Zhendong Guo<sup>2</sup>, Kentaro Nagaoka<sup>3</sup>, Chunmei Li<sup>1,\*</sup>

<sup>1</sup> Research Centre for Livestock Environmental Control and Smart Production, College of Animal Science and Technology, Nanjing Agricultural University, Nanjing 210095, China

<sup>2</sup> Military Veterinary Research Institute, Academy of Military Medical Sciences, Changchun 130117, China.

<sup>3</sup> Laboratory of Veterinary Physiology, Department of Veterinary Medicine, Faculty of Agriculture, Tokyo University of Agriculture and Technology, Tokyo, 183-8509, Japan

\* Corresponding author: Professor Chunmei Li

E-mail: chunmeili@njau.edu.cn, Tel.: 00 86 25 84395971

National Natural Science Foundation of China (No. 32072781), China Postdoctoral Science Foundation (2022M721651), Jiangsu Agricultural Industry Technology System (JATS(2022)480).

Table S1 The actual exposure concentrations of particulate matter ( $\text{mg}\cdot\text{m}^{-3}$ ) with different particle sizes in each group during period of exposure and recover.

| Items             | Broiler house <sup>1</sup> | Experiment chambers (Exposure) |                                  |                                  | Recover           |
|-------------------|----------------------------|--------------------------------|----------------------------------|----------------------------------|-------------------|
|                   |                            | Control                        | $4 \text{ mg}\cdot\text{m}^{-3}$ | $8 \text{ mg}\cdot\text{m}^{-3}$ |                   |
| PM <sub>1</sub>   | $0.571 \pm 0.017$          | $0.254 \pm 0.052$              | $1.157 \pm 0.126$                | $1.710 \pm 0.099$                | $0.419 \pm 0.009$ |
| PM <sub>2.5</sub> | $0.713 \pm 0.021$          | $0.256 \pm 0.052$              | $1.264 \pm 0.120$                | $1.976 \pm 0.083$                | $0.421 \pm 0.009$ |
| PM <sub>4</sub>   | $0.991 \pm 0.029$          | $0.260 \pm 0.052$              | $1.402 \pm 0.115$                | $2.343 \pm 0.065$                | $0.427 \pm 0.010$ |
| PM <sub>10</sub>  | $2.499 \pm 0.077$          | $0.327 \pm 0.052$              | $2.344 \pm 0.106$                | $4.479 \pm 0.097$                | $0.536 \pm 0.019$ |
| TSP               | $4.033 \pm 0.129$          | $0.657 \pm 0.117$              | $4.359 \pm 0.078$                | $8.111 \pm 0.130$                | $1.198 \pm 0.077$ |

<sup>1</sup> The data cited from a published paper [50].

Table S2 Sequences and parameters of gene primers used for quantitative real-time PCR.

| Gene           | Accession No.  | Primer sequences               | Primer size, bp |
|----------------|----------------|--------------------------------|-----------------|
| <i>Fas</i>     | NM_205155.3    | F: 5' GCTAAGATGGCATTGCACGG 3'  | 20              |
|                |                | R: 5' TCCATTCAGTTCCAGACGGC 3'  | 20              |
| <i>Hmgcr</i>   | XM_015277227.2 | F: 5' CAAATGCGGTTTCCTGTCCTT 3' | 21              |
|                |                | R: 5' AGTGGCTACACACCTCTTCC 3'  | 20              |
| <i>Hmgcs2</i>  | XM_422225.6    | F: 5' GCTCTGTGCATCCCAAAACG 3'  | 20              |
|                |                | R: 5' CCTTATCAGCACATCGGGCA 3'  | 20              |
| <i>PPARα</i>   | XM_015289937.2 | F: 5' CTCTGCCCTTGACGGAAAGT 3'  | 20              |
|                |                | R: 5' AAGGTTGAAACAGAAGCCGC 3'  | 20              |
| <i>β-actin</i> | NM_205518.1    | F: 5' TTGTCCACCGCAAATGCTTC 3'  | 20              |
|                |                | R: 5' AAGCCATGCCAATCTCGTCT 3'  | 20              |

Table S3 Effects of particulate matter exposure on organ indices of broilers.

| Items            | Control       | 4 mg·m <sup>-3</sup> | 8 mg·m <sup>-3</sup> |
|------------------|---------------|----------------------|----------------------|
| <b>E 7</b>       |               |                      |                      |
| Heart (g)        | 5.91 ± 0.588  | 5.86 ± 0.331         | 6.32 ± 0.619         |
| Heart index (%)  | 0.66 ± 0.039  | 0.67 ± 0.048         | 0.76 ± 0.073         |
| Lung (g)         | 4.93 ± 0.324  | 5.56 ± 0.781         | 5.25 ± 0.583         |
| Lung index (%)   | 0.56 ± 0.040  | 0.61 ± 0.060         | 0.626 ± 0.053        |
| Liver (g)        | 24.81 ± 1.758 | 24.79 ± 1.681        | 21.31 ± 1.458        |
| Liver index (%)  | 2.87 ± 0.345  | 2.76 ± 0.085         | 2.58 ± 0.166         |
| Spleen (g)       | 1.15 ± 0.136  | 1.54 ± 0.160         | 1.19 ± 0.103         |
| Spleen index (%) | 0.13 ± 0.010  | 0.17 ± 0.016         | 0.14 ± 0.005         |
| <b>E 14</b>      |               |                      |                      |
| Heart (g)        | 8.56 ± 0.413  | 8.17 ± 0.431         | 8.61 ± 0.498         |
| Heart index (%)  | 0.64 ± 0.045  | 0.63 ± 0.068         | 0.72 ± 0.043         |
| Lung (g)         | 7.73 ± 0.512  | 7.41 ± 0.677         | 6.59 ± 0.356         |
| Lung index (%)   | 0.57 ± 0.036  | 0.54 ± 0.023         | 0.55 ± 0.045         |
| Liver (g)        | 34.28 ± 1.446 | 33.90 ± 2.407        | 40.58 ± 3.48         |
| Liver index (%)  | 2.55 ± 0.164  | 2.50 ± 0.076         | 3.58 ± 0.612         |
| Spleen (g)       | 1.91 ± 0.203  | 1.93 ± 0.174         | 2.45 ± 0.644         |
| Spleen index (%) | 0.14 ± 0.010  | 0.14 ± 0.008         | 0.22 ± 0.077         |
| <b>R 7</b>       |               |                      |                      |
| Heart (g)        | 10.22 ± 0.734 | 10.26 ± 0.574        | 9.73 ± 0.975         |
| Heart index (%)  | 0.53 ± 0.029  | 0.53 ± 0.042         | 0.53 ± 0.050         |
| Lung (g)         | 9.71 ± 0.711  | 10.35 ± 1.265        | 8.69 ± 1.157         |
| Lung index (%)   | 0.51 ± 0.035  | 0.53 ± 0.063         | 0.48 ± 0.070         |
| Liver (g)        | 41.92 ± 2.035 | 43.52 ± 2.101        | 47.72 ± 3.230        |
| Liver index (%)  | 2.21 ± 0.140  | 2.25 ± 0.137         | 2.61 ± 0.171         |
| Spleen (g)       | 2.45 ± 0.265  | 3.27 ± 0.693         | 3.15 ± 0.399         |
| Spleen index (%) | 0.13 ± 0.013  | 0.17 ± 0.034         | 0.17 ± 0.023         |

Each value represents the mean ± SEM of the group (n = 8).

E7, exposure for 7 days; E14, exposure for 14 days; R7, recover for 7 days.

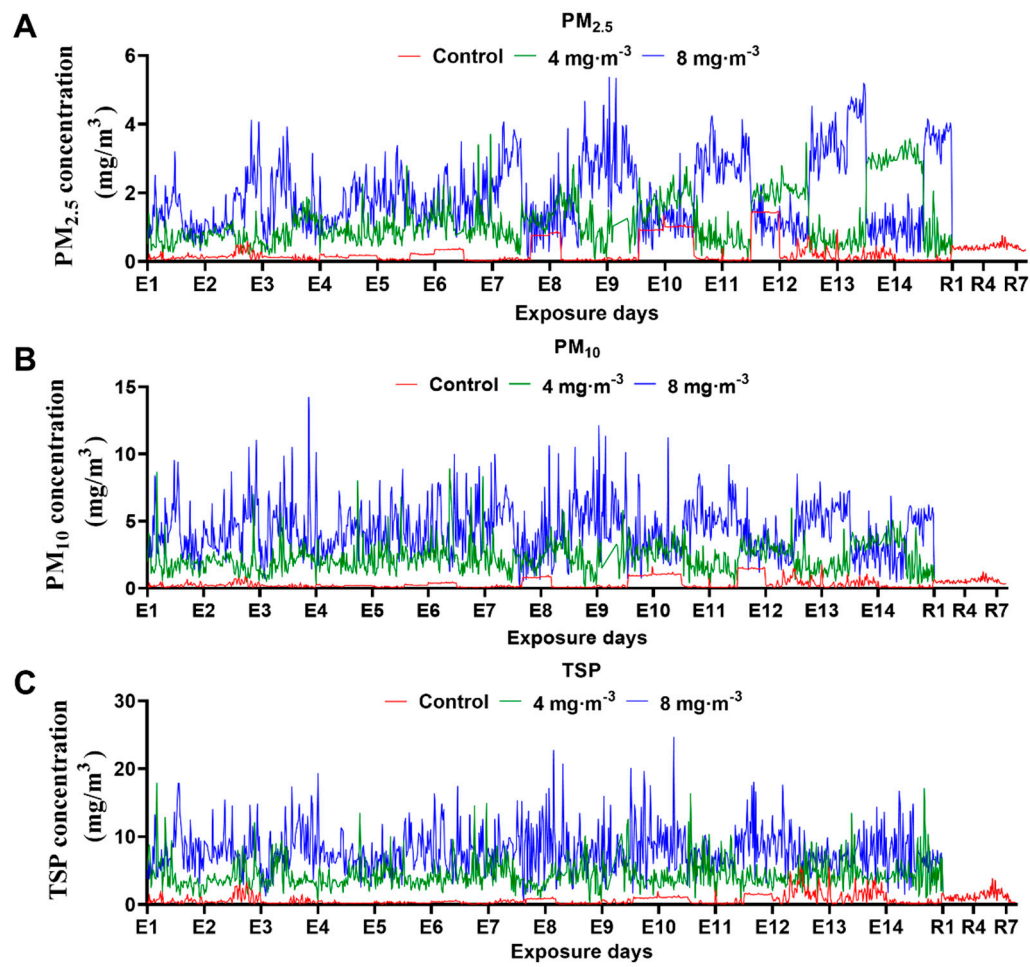

**Figure S1.** Real-time monitoring of actual concentrations of PM<sub>2.5</sub> (A), PM<sub>10</sub> (B) and TSP (C) during exposure and recover in chambers of control and PM-exposed groups. E, exposure; R, recover.

## References

50. Shen, D.; Guo, Z.; Huang, K.; Dai, P.; Jin, X.; Li, Y.; Li, C. Inflammation-Associated Pulmonary Microbiome and Metabolome Changes in Broilers Exposed to Particulate Matter in Broiler Houses. *J. Hazard. Mater.* **2022**, *421*, 126710. <https://doi.org/10.1016/j.jhazmat.2021.126710>.
